# Supplementary material
Source: Springer Nature journal article supplement (https://www.springermedizin.de/resource/supplementary/13013_2010_324_MOESM4_ESM.pdf/9631630)

(a)

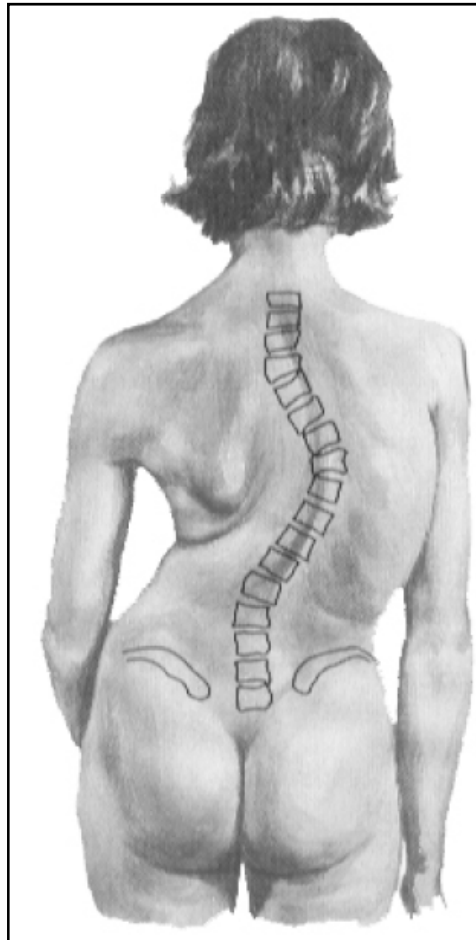

(b)

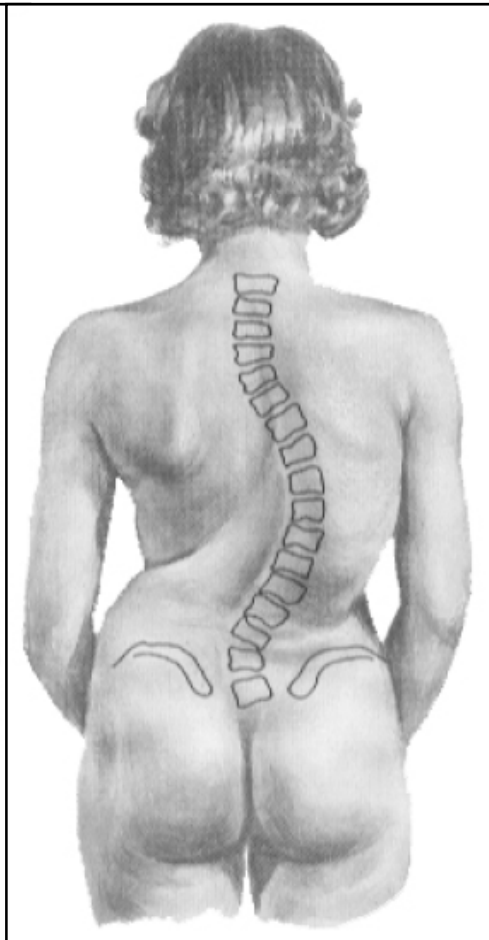

(c)

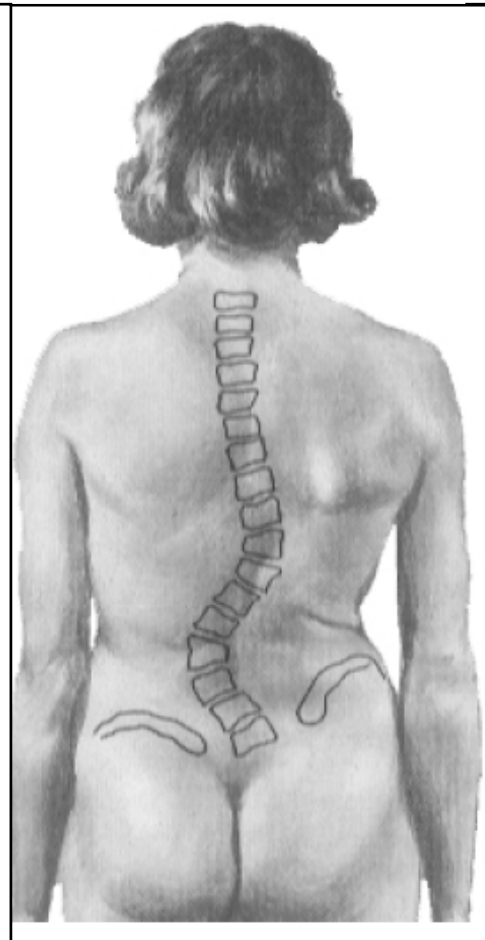

(d)

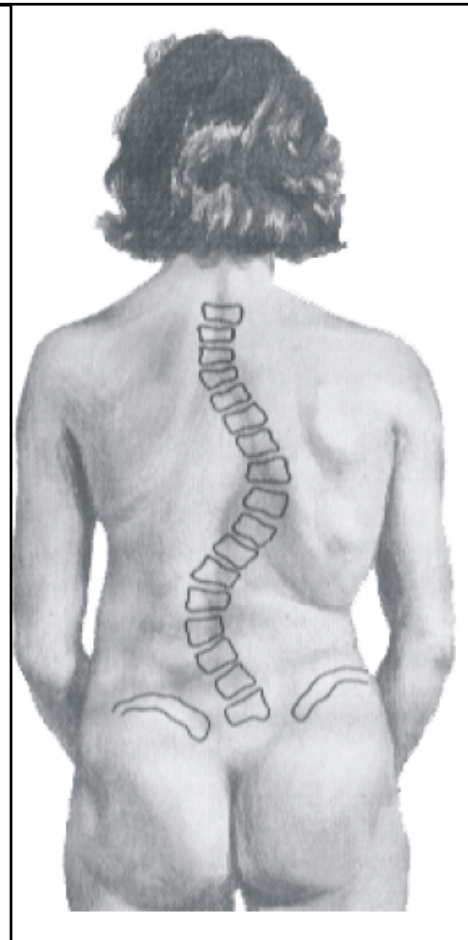

Supplement: MOESM4 [file 9631630]
